# Supplementary material for: Intrinsic tumor necrosis factor-α pathway is activated in a subset of patients with focal segmental glomerulosclerosis
Source: PubMed Central journal article supplement (PMC6522053; doi:10.1371/journal.pone.0216426), 2019-05-16
Supplement: pone.0216426.s001.pdf [file pone.0216426.s001.pdf]

## S1 Table

Amplification parameters were: 95°C for 5 min, followed by 40 cycles of 5 s at 95°C, 10 s at 65°C and 10 s at 72°C, followed by 5 s at 95°C.

huTNF-F: CAACCTCCTCTCTGCCATCAAGA  
huTNF-R: CTGGAAGACCCCTCCCAGATAGA  
huTNFRSF1A-F (TNFRI): GTGCCTACCCAGATTGAGA  
huTNFRSF1A-R (TNFRI): TGTCGATTTCCACAAACAA  
huTNFRSF1B-F (TNFRII): GGAAACTCAAGCCTGCACTC  
huTNFRSF1B-R (TNFRII): TGCAAATATCCGTGGATGAA  
huCCL2-F: CCCCAGTCACCTGCTGTTAT  
huCCL2-R: AGATCTCCTTGGCCACAATG  
huCCL5-F: GAGGCTTCCCCTCACTATCC  
huCCL5-R: CTCAAGTGATCCACCCACCT  
huCD40-F: GCAGGCACAAACAAGACTGA  
huCD40-R: TCGGGAAAATTGATCTCCTG  
huVCAM-F: CTACGCTGACAATGAATCCTGTT  
huVCAM-R: CCAGAGGGCCACTCAAATGAA  
huTNFSF10-F: TCAAGTGGCAACTCCGTCAG  
huTNFSF10-R: TGGTCCCAGTTATGTGAGCTG  
huTNFRSF12A-F: CTCTGAGCCTGACCTTCGTG  
huTNFRSF12A-R: GGGGCACATTGTCCTGAT
