# Supplementary material for: Intrinsic tumor necrosis factor-α pathway is activated in a subset of patients with focal segmental glomerulosclerosis
Source: PubMed Central journal article supplement (PMC6522053; doi:10.1371/journal.pone.0216426), 2019-05-16
Supplement: pone.0216426.s002.pdf [file pone.0216426.s002.pdf]

S2 Table 2

| TNFa gene pathway query - list |                                                                                  |             |
|--------------------------------|----------------------------------------------------------------------------------|-------------|
| #                              | Gene Name                                                                        | Gene Symbol |
| 1                              | ArfGAP with FG repeats 1                                                         | AGFG1       |
| 2                              | ArfGAP with FG repeats 2                                                         | AGFG2       |
| 3                              | v-akt murine thymoma viral oncogene homolog 1                                    | AKT1        |
| 4                              | v-akt murine thymoma viral oncogene homolog 2                                    | AKT2        |
| 5                              | v-akt murine thymoma viral oncogene homolog 3 (protein kinase B, gamma)          | AKT3        |
| 6                              | Rho GDP dissociation inhibitor (GDI) beta                                        | ARHGDIB     |
| 7                              | activating transcription factor 2                                                | ATF2        |
| 8                              | activating transcription factor 6 beta                                           | ATF6B       |
| 9                              | BCL2-associated athanogene 4                                                     | BAG4        |
| 10                             | B-cell CLL/lymphoma 3                                                            | BCL3        |
| 11                             | baculoviral IAP repeat-containing 2                                              | BIRC2       |
| 12                             | baculoviral IAP repeat-containing 3                                              | BIRC3       |
| 13                             | carbamoyl-phosphate synthetase 2, aspartate transcarbamylase, and dihydroorotase | CAD         |
| 14                             | caspase 10, apoptosis-related cysteine peptidase                                 | CASP10      |
| 15                             | caspase 2, apoptosis-related cysteine peptidase                                  | CASP2       |
| 16                             | caspase 3, apoptosis-related cysteine peptidase                                  | CASP3       |
| 17                             | caspase 7, apoptosis-related cysteine peptidase                                  | CASP7       |
| 18                             | caspase 8, apoptosis-related cysteine peptidase                                  | CASP8       |
| 19                             | chemokine (C-C motif) ligand 2                                                   | CCL2        |
| 20                             | chemokine (C-C motif) ligand 20                                                  | CCL20       |
| 21                             | chemokine (C-C motif) ligand 5                                                   | CCL5        |
| 22                             | CD27 molecule                                                                    | CD27        |
| 23                             | CD40 molecule, TNF receptor superfamily member 5                                 | CD40        |
| 24                             | CD40 ligand                                                                      | CD40LG      |
| 25                             | CD70 molecule                                                                    | CD70        |
| 26                             | CCAAT/enhancer binding protein (C/EBP), beta                                     | CEBPB       |
| 27                             | CASP8 and FADD-like apoptosis regulator                                          | CFLAR       |
| 28                             | conserved helix-loop-helix ubiquitous kinase                                     | CHUK        |
| 29                             | CASP2 and RIPK1 domain containing adaptor with death domain                      | CRADD       |
| 30                             | cAMP responsive element binding protein 1                                        | CREB1       |
| 31                             | cAMP responsive element binding protein 3                                        | CREB3       |
| 32                             | cAMP responsive element binding protein 3-like 1                                 | CREB3L1     |
| 33                             | cAMP responsive element binding protein 3-like 2                                 | CREB3L2     |
| 34                             | cAMP responsive element binding protein 5                                        | CREB5       |
| 35                             | colony stimulating factor 1 (macrophage)                                         | CSF1        |
| 36                             | colony stimulating factor 2 (granulocyte-macrophage)                             | CSF2        |
| 37                             | chemokine (C-X3-C motif) ligand 1                                                | CX3CL1      |
| 38                             | chemokine (C-X-C motif) ligand 1 (melanoma growth stimulating activity, alpha)   | CXCL1       |
| 39                             | chemokine (C-X-C motif) ligand 10                                                | CXCL10      |
| 40                             | chemokine (C-X-C motif) ligand 2                                                 | CXCL2       |
| 41                             | chemokine (C-X-C motif) ligand 3                                                 | CXCL3       |
| 42                             | chemokine (C-X-C motif) ligand 5                                                 | CXCL5       |
| 43                             | DNA fragmentation factor, 45kDa, alpha polypeptide                               | DFFA        |
| 44                             | dynammin 1-like                                                                  | DNM1L       |
| 45                             | dual specificity phosphatase 1                                                   | DUSP1       |

|    |                                                                                                  |         |
|----|--------------------------------------------------------------------------------------------------|---------|
| 46 | ectodysplasin A2 receptor                                                                        | EDA2R   |
| 47 | endothelin 1                                                                                     | EDN1    |
| 48 | Fas (TNFRSF6)-associated via death domain                                                        | FADD    |
| 49 | Fas (TNF receptor superfamily, member 6)                                                         | FAS     |
| 50 | Fas ligand (TNF superfamily, member 6)                                                           | FASLG   |
| 51 | FBJ murine osteosarcoma viral oncogene homolog                                                   | FOS     |
| 52 | intercellular adhesion molecule 1                                                                | ICAM1   |
| 53 | inhibitor of kappa light polypeptide gene enhancer in B-cells, kinase complex-associated protein | IKBKAP  |
| 54 | inhibitor of kappa light polypeptide gene enhancer in B-cells, kinase beta                       | IKKBK   |
| 55 | interleukin 15                                                                                   | IL15    |
| 56 | interleukin 18 receptor 1                                                                        | IL18R1  |
| 57 | interleukin 1, beta                                                                              | IL1B    |
| 58 | interleukin 6 (interferon, beta 2)                                                               | IL6     |
| 59 | itchy E3 ubiquitin protein ligase homolog (mouse)                                                | ITCH    |
| 60 | jagged 1 (Alagille syndrome)                                                                     | JAG1    |
| 61 | jun oncogene                                                                                     | JUN     |
| 62 | jun B proto-oncogene                                                                             | JUNB    |
| 63 | leukemia inhibitory factor (cholinergic differentiation factor)                                  | LIF     |
| 64 | lamin A/C                                                                                        | LMNA    |
| 65 | lamin B1                                                                                         | LMNB1   |
| 66 | lamin B2                                                                                         | LMNB2   |
| 67 | lymphotoxin alpha (TNF superfamily, member 1)                                                    | LTA     |
| 68 | lymphotoxin beta (TNF superfamily, member 3)                                                     | LTB     |
| 69 | lymphotoxin beta receptor (TNFR superfamily, member 3)                                           | LTBR    |
| 70 | MAP-kinase activating death domain                                                               | MADD    |
| 71 | membrane associated guanylate kinase, WW and PDZ domain containing 2                             | MAGI2   |
| 72 | mitogen-activated protein kinase kinase 1                                                        | MAP2K1  |
| 73 | mitogen-activated protein kinase kinase 3                                                        | MAP2K3  |
| 74 | mitogen-activated protein kinase kinase 4                                                        | MAP2K4  |
| 75 | mitogen-activated protein kinase kinase 6                                                        | MAP2K6  |
| 76 | mitogen-activated protein kinase kinase 7                                                        | MAP2K7  |
| 77 | mitogen-activated protein kinase kinase kinase 1                                                 | MAP3K1  |
| 78 | mitogen-activated protein kinase kinase kinase 14                                                | MAP3K14 |
| 79 | mitogen-activated protein kinase kinase kinase 5                                                 | MAP3K5  |
| 80 | mitogen-activated protein kinase kinase kinase 7                                                 | MAP3K7  |
| 81 | mitogen-activated protein kinase kinase kinase 8                                                 | MAP3K8  |
| 82 | mitogen-activated protein kinase 1                                                               | MAPK1   |
| 83 | mitogen-activated protein kinase 10                                                              | MAPK10  |
| 84 | mitogen-activated protein kinase 11                                                              | MAPK11  |
| 85 | mitogen-activated protein kinase 12                                                              | MAPK12  |
| 86 | mitogen-activated protein kinase 13                                                              | MAPK13  |
| 87 | mitogen-activated protein kinase 14                                                              | MAPK14  |
| 88 | mitogen-activated protein kinase 3                                                               | MAPK3   |
| 89 | mitogen-activated protein kinase 8                                                               | MAPK8   |
| 90 | mitogen-activated protein kinase 9                                                               | MAPK9   |
| 91 | matrix metalloproteinase 14 (membrane-inserted)                                                  | MMP14   |
| 92 | matrix metalloproteinase 3 (stromelysin 1, progelatinase)                                        | MMP3    |
| 93 | matrix metalloproteinase 9 (gelatinase B, 92kDa gelatinase, 92kDa type IV collagenase)           | MMP9    |

|     |                                                                                               |           |
|-----|-----------------------------------------------------------------------------------------------|-----------|
| 94  | nuclear factor of kappa light polypeptide gene enhancer in B-cells 1                          | NFKB1     |
| 95  | nuclear factor of kappa light polypeptide gene enhancer in B-cells inhibitor, alpha           | NFKBIA    |
| 96  | nerve growth factor receptor                                                                  | NGFR      |
| 97  | nucleotide-binding oligomerization domain containing 2                                        | NOD2      |
| 98  | p21 protein (Cdc42/Rac)-activated kinase 1                                                    | PAK1      |
| 99  | p21 protein (Cdc42/Rac)-activated kinase 2                                                    | PAK2      |
| 100 | poly (ADP-ribose) polymerase 1                                                                | PARP1     |
| 101 | peptidoglycan recognition protein 1                                                           | PGLYRP1   |
| 102 | phosphoinositide-3-kinase, catalytic, alpha polypeptide                                       | PIK3CA    |
| 103 | phosphoinositide-3-kinase, catalytic, beta polypeptide                                        | PIK3CB    |
| 104 | phosphoinositide-3-kinase, catalytic, delta polypeptide                                       | PIK3CD    |
| 105 | phosphoinositide-3-kinase, catalytic, gamma polypeptide                                       | PIK3CG    |
| 106 | phosphoinositide-3-kinase, regulatory subunit 1 (alpha)                                       | PIK3R1    |
| 107 | phosphoinositide-3-kinase, regulatory subunit 2 (beta)                                        | PIK3R2    |
| 108 | phosphoinositide-3-kinase, regulatory subunit 3 (gamma)                                       | PIK3R3    |
| 109 | phosphoinositide-3-kinase, regulatory subunit 5                                               | PIK3R5    |
| 110 | protein kinase, DNA-activated, catalytic polypeptide                                          | PRKDC     |
| 111 | proteasome (prosome, macropain) assembly chaperone 2                                          | PSMG2     |
| 112 | prostaglandin-endoperoxide synthase 2 (prostaglandin G/H synthase and cyclooxygenase)         | PTGS2     |
| 113 | retinoblastoma 1                                                                              | RB1       |
| 114 | v-rel reticuloendotheliosis viral oncogene homolog A (avian)                                  | RELA      |
| 115 | receptor (TNFRSF)-interacting serine-threonine kinase 1                                       | RIPK1     |
| 116 | ribosomal protein S6 kinase, 90kDa, polypeptide 4                                             | RPS6KA4   |
| 117 | ribosomal protein S6 kinase, 90kDa, polypeptide 5                                             | RPS6KA5   |
| 118 | selectin E                                                                                    | SELE      |
| 119 | suppressor of cytokine signaling 3                                                            | SOCS3     |
| 120 | spectrin, alpha, non-erythrocytic 1 (alpha-fodrin)                                            | SPTAN1    |
| 121 | TGF-beta activated kinase 1/MAP3K7 binding protein 1                                          | TAB1      |
| 122 | TGF-beta activated kinase 1/MAP3K7 binding protein 2                                          | TAB2      |
| 123 | tumor necrosis factor                                                                         | TNF       |
| 124 | tumor necrosis factor, alpha-induced protein 3                                                | TNFAIP3   |
| 125 | tumor necrosis factor receptor superfamily, member 10b                                        | TNFRSF10B |
| 126 | tumor necrosis factor receptor superfamily, member 10c, decoy without an intracellular domain | TNFRSF10C |
| 127 | tumor necrosis factor receptor superfamily, member 10d, decoy with truncated death domain     | TNFRSF10D |
| 128 | tumor necrosis factor receptor superfamily, member 11a, NFKB activator                        | TNFRSF11A |
| 129 | tumor necrosis factor receptor superfamily, member 11b                                        | TNFRSF11B |
| 130 | tumor necrosis factor receptor superfamily, member 12A                                        | TNFRSF12A |
| 131 | tumor necrosis factor receptor superfamily, member 13B                                        | TNFRSF13B |
| 132 | tumor necrosis factor receptor superfamily, member 14 (herpesvirus entry mediator)            | TNFRSF14  |
| 133 | tumor necrosis factor receptor superfamily, member 17                                         | TNFRSF17  |
| 134 | tumor necrosis factor receptor superfamily, member 1A                                         | TNFRSF1A  |
| 135 | tumor necrosis factor receptor superfamily, member 1B                                         | TNFRSF1B  |
| 136 | tumor necrosis factor receptor superfamily, member 21                                         | TNFRSF21  |
| 137 | tumor necrosis factor receptor superfamily, member 25                                         | TNFRSF25  |
| 138 | tumor necrosis factor receptor superfamily, member 4                                          | TNFRSF4   |
| 139 | tumor necrosis factor receptor superfamily, member 6b, decoy                                  | TNFRSF6B  |
| 140 | tumor necrosis factor receptor superfamily, member 8                                          | TNFRSF8   |
| 141 | tumor necrosis factor receptor superfamily, member 9                                          | TNFRSF9   |

|     |                                                       |         |
|-----|-------------------------------------------------------|---------|
| 142 | tumor necrosis factor (ligand) superfamily, member 10 | TNFSF10 |
| 143 | tumor necrosis factor (ligand) superfamily, member 11 | TNFSF11 |
| 144 | tumor necrosis factor (ligand) superfamily, member 12 | TNFSF12 |
| 145 | tumor necrosis factor (ligand) superfamily, member 14 | TNFSF14 |
| 146 | tumor necrosis factor (ligand) superfamily, member 15 | TNFSF15 |
| 147 | tumor necrosis factor (ligand) superfamily, member 18 | TNFSF18 |
| 148 | tumor necrosis factor (ligand) superfamily, member 4  | TNFSF4  |
| 149 | tumor necrosis factor (ligand) superfamily, member 8  | TNFSF8  |
| 150 | tumor necrosis factor (ligand) superfamily, member 9  | TNFSF9  |
| 151 | TNFRSF1A-associated via death domain                  | TRADD   |
| 152 | TNF receptor-associated factor 1                      | TRAF1   |
| 153 | TNF receptor-associated factor 2                      | TRAF2   |
| 154 | TNF receptor-associated factor 3                      | TRAF3   |
| 155 | TNF receptor-associated factor 5                      | TRAF5   |
| 156 | vascular cell adhesion molecule 1                     | VCAM1   |
| 157 | vascular endothelial growth factor C                  | VEGFC   |
