# Supplementary material for: Intrinsic tumor necrosis factor-α pathway is activated in a subset of patients with focal segmental glomerulosclerosis
Source: PubMed Central journal article supplement (PMC6522053; doi:10.1371/journal.pone.0216426), 2019-05-16
Supplement: pone.0216426.s003.pdf [file pone.0216426.s003.pdf]

**S3 Table**

| FSGS group     | Cohort Number | Sex | Age (Years) | Creatinine, mg/dL | BUN ( mg/dL) | eGFR (MDRD), mg/min/1.73m | CKD stage |
|----------------|---------------|-----|-------------|-------------------|--------------|---------------------------|-----------|
| Ju CKD dataset | 1             | M   | 53          | 1.2               | 23           | 67                        | 2         |
|                | 2             | M   | 67          | 1.1               | 33           | 73                        | 2         |
|                | 3             | M   | N.A.        | 0.8               | N.A.         | N.A.                      | N.A.      |
|                | 4             | M   | 22          | 4.0               | 44           | 20                        | 4         |
|                | 5             | F   | 62          | 3.2               | 86           | 21                        | 4         |
|                | 6             | M   | 66          | 1.4               | 14           | 54                        | 3A        |
|                | 7             | M   | 49          | 1.4               | 51           | 57                        | 3A        |
|                | 8             | M   | 22          | 0.8               | 30           | 128                       | 1         |
|                | 9             | M   | 37          | 2.0               | 65           | 40                        | 3B        |
|                | 10            | F   | 66          | 1.3               | 45           | 44                        | 3B        |
|                | 11            | M   | 40          | 0.9               | N.A.         | 99                        | 1         |
|                | 12            | M   | 32          | 1.0               | 20           | 92                        | 1         |
|                | 13            | F   | 51          | 0.7               | 21           | 94                        | 1         |
|                | 14            | F   | 67          | 0.8               | 13           | 80                        | 2         |
|                | 15            | F   | 33          | 0.7               | 46           | 105                       | 1         |
|                | 16            | F   | 47          | 1.1               | 17           | 60                        | 2         |
|                | 17            | F   | 39          | 2.7               | 194          | 21                        | 4         |
|                | 18            | M   | 32          | 0.8               | 36           | 119                       | 1         |
|                | 19            | F   | 55          | 0.6               | N.A.         | 111                       | 1         |
|                | 20            | M   | 28          | 0.8               | N.A.         | 125                       | 1         |
|                | 21            | F   | 54          | 0.8               | 23           | 79                        | 2         |
|                | 22            | F   | 21          | 0.7               | 7            | 112                       | 1         |
|                | 23            | F   | 63          | 1.3               | 13           | 44                        | 3B        |
|                | 24            | F   | 51          | 0.8               | 14           | 82                        | 2         |
|                | 25            | M   | 43          | 1.4               | 17           | 60                        | 2         |

*List of abbreviations:* BUN – blood urea nitrogen, eGFR – estimated glomerular filtration rate, MDRD -- Modification of Diet in Renal Disease Study formula to calculate eGFR, CKD – chronic kidney disease, M-male, F – female, N.A. – not available
